# Supplementary material for: MicroRNA Zma-miR528 Versatile Regulation on Target mRNAs during Maize Somatic Embryogenesis
Source: MDPI journal article supplement (doi:10.3390/ijms22105310), 2021-05-18
Supplement: s1 [file s1]

## Supplementary Figures

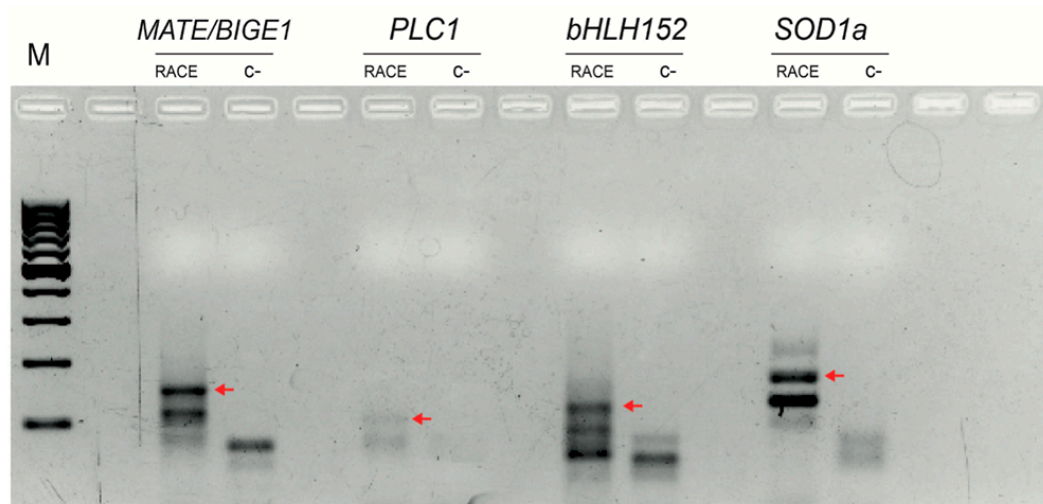

**Figure S1.** Gel image of 5' RLM-RACE showing the amplified products (ranging from 100-200 bp) after consecutive PCR reactions. The slower migrating band in each lane (red arrows) was purified for DNA sequencing. C-: negative control for PCR.

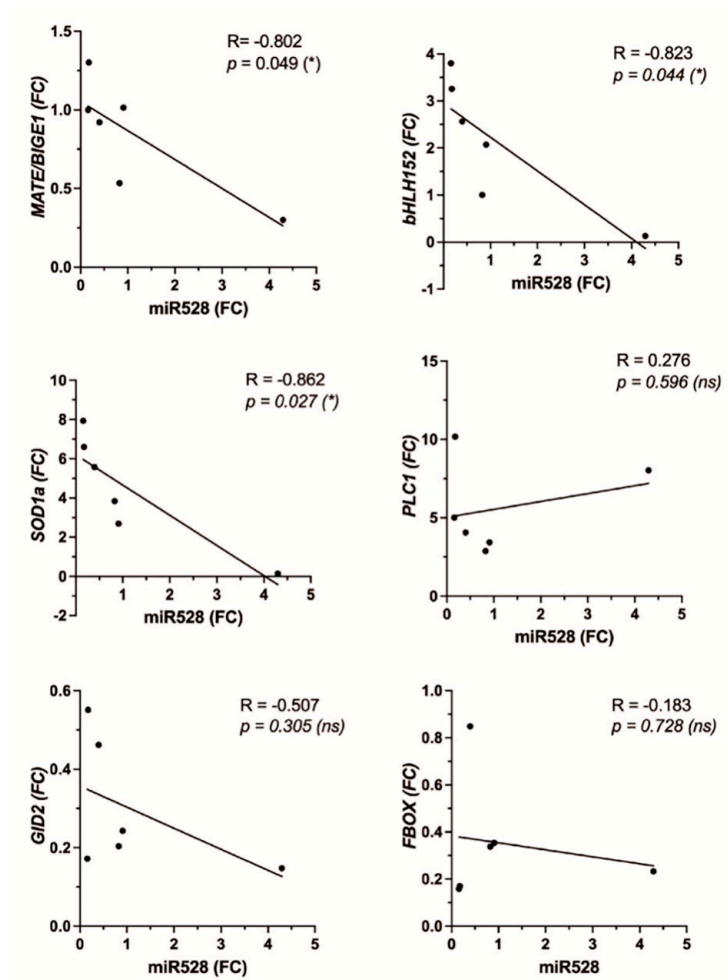

**Figure S2.** Pearson correlation analysis between zma-miR528 and the selected targets during SE. Pearson analysis was performed using the average fold change (FC) values in all tissues evaluated. Pearson correlations (R value) and statistical significance (*p* values) are displayed. \* *p* < 0.05; \*\* *p* < 0.01, *ns*: no significance.

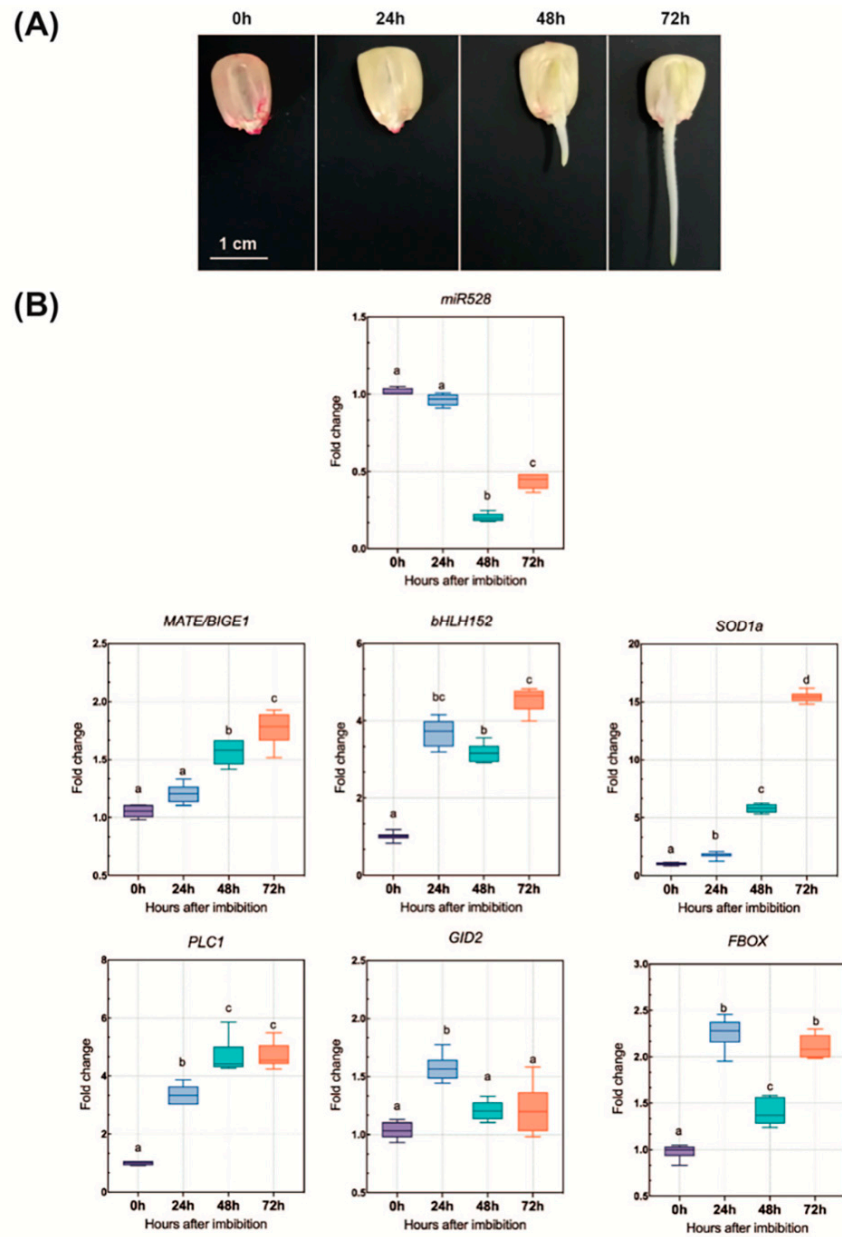

**Figure S3.** Differential accumulation of *zma-miR528* and target transcripts in dry (0h) and imbibed (24h-72h) embryonic axes. **(A)** Representative images for the VS-535 maize seed from 0h to 72h of imbibition. **(B)** *zma-miR528* and targets were analyzed by RT-qPCR at 0h, 24h, 48h, and 72h after imbibition. Fold change represents abundance relative to 0 h and normalized by U6 snRNA internal control for the microRNA or 18S rRNA for target transcripts. The results were obtained from three independent biological replicates ( $n=3$ ) with three technical replicates for each one ( $n=9$ ). Data were analyzed by performing one-way ANOVA with multiple comparisons by the Tukey post-hoc test. Boxes that do not share at least a common letter differ significantly ( $p < 0.005$ ).

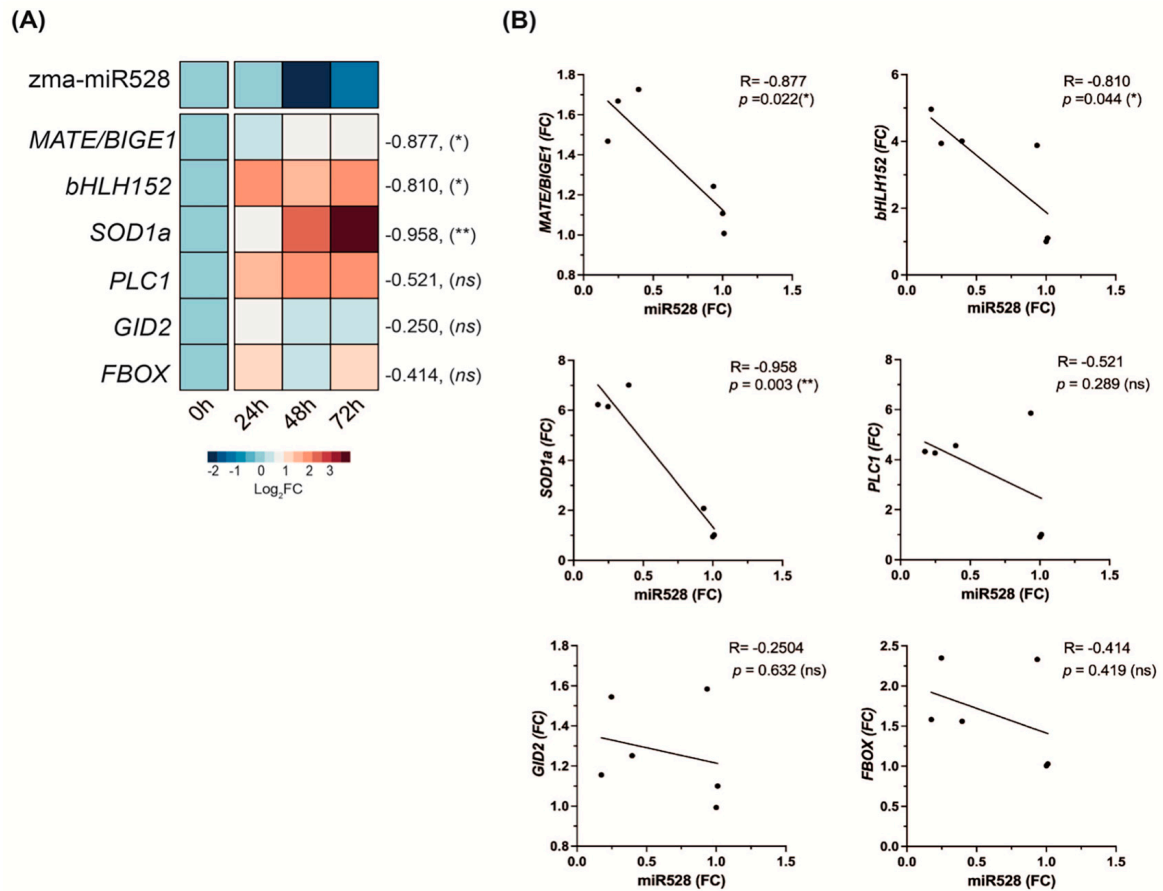

**Figure S4.** Negative correlation between zma-miR528 and the selected targets abundance during maize seed imbibition. **(A)** Heatmap showing log<sub>2</sub>-fold-change (Log<sub>2</sub>FC) of zma-miR528 and selected targets. Numbers on the right side represent Pearson's coefficient (R) and the significance value (*p*) for the correlation analysis between zma-miR528 and each target relative abundances. **(B)** Pearson correlation analysis of fold changes between zma-miR528 and selected targets during imbibition and germination. Pearson correlations (R value) and statistical significance (*p* values) are displayed. \* *p* < 0.05; \*\* *p* < 0.01, ns: no significance.
